# Supplementary material for: Risk of Early-Onset Neonatal Group B Streptococcal Disease With Maternal Colonization Worldwide: Systematic Review and Meta-analyses
Source: PubMed Central journal article supplement (PMC5850448; doi:10.1093/cid/cix655), 2017-11-06

**The burden of Group B *Streptococcus* worldwide for pregnant women, stillbirths and children**

**Paper 7: Risk of early-onset neonatal group B *Streptococcus* disease with maternal colonization worldwide: systematic review and meta-analyses**

**Supplementary information**

## Contents

|                                                                                                                                                                   |    |
|-------------------------------------------------------------------------------------------------------------------------------------------------------------------|----|
| <b>The burden of Group B <i>Streptococcus</i> worldwide for pregnant women, stillbirths and children</b> .....                                                    | 1  |
| <b>Paper 7: Risk of early-onset neonatal group B <i>Streptococcus</i> disease with maternal colonization worldwide: systematic review and meta-analyses</b> ..... | 1  |
| <b>Supplementary information</b> .....                                                                                                                            | 1  |
| Supplementary Table S1: Search strategy and sources of data .....                                                                                                 | 3  |
| Supplementary Table S2: Assessment of potential for bias in studies.....                                                                                          | 4  |
| Supplementary Table S3: Characteristics of included studies.....                                                                                                  | 5  |
| Supplementary Table S4: Summary of risk of EOD in different IAP policy contexts and in the presence of risk factors (sensitivity analyses).....                   | 7  |
| Supplementary Figure S1: Meta-analysis of risk of EOD with a policy of IAP for GBS colonized mothers .....                                                        | 8  |
| Supplementary Figure S2: Meta-analysis of risk of EOGBS (all studies regardless of IAP policy).....                                                               | 9  |
| Supplementary Figure S3: Meta-analysis of studies describing any risk factor (regardless of IAP policy).....                                                      | 10 |
| Supplementary Figure S4: Meta-analysis of studies describing gestational age (regardless of IAP policy).....                                                      | 11 |
| Supplementary Figure S5: Meta-analysis of studies describing prolonged rupture of membranes (regardless of IAP policy).....                                       | 12 |
| Supplementary Figure S6: Meta-analysis of studies describing maternal fever (regardless of IAP policy).....                                                       | 13 |

## Supplementary Table S1: Search strategy and sources of data

- Maternal colonisation search (see Paper 2 of this Supplement)
  - No date restrictions (*including high income >10yrs old*)
  - Including all studies with a cohort of more than 200 GBS colonised mothers which report on neonatal outcomes with availability of blood and csf culture
- Recent systematic review of prevalence of early-onset neonatal infection among newborns of mothers with colonisation/infection (including but not limited to studies on GBS) (Chan et al 2015)
- Cochrane reviews
  - IAP for maternal colonisation (2014)
  - Chlorhexidine for prevention of neonatal GBS disease (2014)
- UK cost effectiveness review (Colbourn et al 2007)
- Reference lists of above
- *Review of risk of neonatal disease in US before CDC recommendations adopted (Benitz 1999) – papers included above*
- Unpublished, anonymised data provided by investigator group

Supplementary Table S2: Assessment of potential for bias in studies

| <b>Category</b>                                | <b>Risk grading</b> | <b>Example</b>                                                                                            |
|------------------------------------------------|---------------------|-----------------------------------------------------------------------------------------------------------|
| <b>Selection bias</b>                          | High risk           | Selection based on risk factors                                                                           |
|                                                | Moderate risk       | Swabs taken after 35 weeks' gestation                                                                     |
|                                                | Low risk            | Unselected representative sample                                                                          |
|                                                | Unclear risk        | Selection inadequately described                                                                          |
| <b>Misclassification of exposure</b>           | High risk           | PCR detection<br>Non vaginal swabs<br>Mothers tested for GBS colonization after diagnosis of newborn      |
|                                                | Moderate risk       | Non selective culture methods                                                                             |
|                                                | Low risk            | Selective enrichment                                                                                      |
|                                                | Unclear risk        | Methods of GBS detection in mothers not described                                                         |
| <b>Loss to follow-up of outcome</b>            | High risk           | Newborns of GBS colonized mothers not all followed up                                                     |
|                                                | Moderate risk       | Follow up < 3 days                                                                                        |
|                                                | Low risk            | Follow up 3-6 days                                                                                        |
|                                                | Unclear risk        | No description of length of follow up                                                                     |
| <b>Overrepresentation of high risk mothers</b> | High risk           | High prevalence of any risk factor (>30%)                                                                 |
|                                                | Moderate risk       | Moderately high prevalence of a risk factor (10-30%)                                                      |
|                                                | Low risk            | Representative prevalence of risk factors                                                                 |
|                                                | Unclear risk        | No description of risk factors                                                                            |
| <b>Misclassification of outcome</b>            | High risk           | Culture diagnosis not available<br>EOD cases not from within the original cohort of GBS colonized mothers |
|                                                | Moderate risk       | Non-selective culture methods                                                                             |
|                                                | Low risk            | Selective enrichment<br>Automated culture                                                                 |
|                                                | Unclear risk        | Methods not described                                                                                     |

Supplementary Table S3: Characteristics of included studies

| Country     | Author                           | Year | Design* | Exclusions                                                                                                                                   | IAP policy for GBS colonization? | Intra-partum antibiotic** (%) | GBS colonized mothers (n) | EOG BS cases | Any risk factors | Risk of bias# | Direction of bias## |
|-------------|----------------------------------|------|---------|----------------------------------------------------------------------------------------------------------------------------------------------|----------------------------------|-------------------------------|---------------------------|--------------|------------------|---------------|---------------------|
| Qatar       | Al taher[1]                      | 2008 | Obsv    |                                                                                                                                              | Y                                | 80                            | 550                       | 0            | Y                | Mod           | Under               |
| Italy       | Berardi[2]                       | 2014 | Obsv    | <35 wks, Planned elective c section, non-Ampicillin IAP                                                                                      | Y                                | 92                            | 499                       | 0            | Y                | Mod           | Under               |
| Spain       | Bosch Mestres[3]                 | 1997 | Obsv    |                                                                                                                                              | Y                                | 93                            | 551                       | 2            | Y                | Low           | Unc                 |
| USA         | Boyer[4]                         | 1983 | Obsv    |                                                                                                                                              | N                                | 20                            | 281                       | 4            | N                | Unc           | Unc                 |
| USA         | Boyer[5]                         | 1983 | Obsv    |                                                                                                                                              | N                                | 16                            | 495                       | 5            | Y                | Unc           | Unc                 |
| Sweden      | Burman[6]                        | 1992 | RCT     | <37wks, planned elective c-section, multiple pregnancy, congenital abnormality, previous infant with GBS, antibiotics within 2 weeks of swab | N                                | 0                             | 797                       | 2            | Y                | Mod           | Under               |
| Italy       | Cantoni[7]                       | 2013 | Obsv    | preterm                                                                                                                                      | Y                                | 83                            | 3010                      | 0            | Y                | Mod           | Under               |
| SouthAfrica | Cutland[8]<br>Secondary Analysis | 2009 | RCT     | Planned c-section, APH, Congenital Malformation, IUD, Age<15, chlorhex allergy, face, genital warts, full cervical dilatation                | RCT                              | 0                             | 825                       | 10           | Y                |               |                     |
| Spain       | De Cueto[9]                      | 1998 | Obsv    | none                                                                                                                                         | Y                                | 44                            | 454                       | 1            | Y                | Unc           | Unc                 |
| Italy       | Della Morte[10]                  | 1996 | Obsv    | ?                                                                                                                                            | Y                                | 76                            | 376                       | 4            | Y                | Unc           | Unc                 |
| USA         | Dillon[11]                       | 1987 | Obsv    |                                                                                                                                              | N                                | 0                             | 1523                      | 24           | Y                | Mod           | Under               |
| Italy       | Facchinetti[12]                  | 2002 | RCT     | <37 weeks, multiple pregnancy, ROM >6 hrs, C section                                                                                         | RCT                              | 50                            | 217                       | 2            | Y                | Mod           | Under               |
| USA         | Faro[13]                         | 2010 | Obsv    |                                                                                                                                              | Y                                | 95                            | 552                       | 3            | Y                | Mod           | Under               |
| Germany     | Grischke[14]                     | 1992 | Obsv    | ?                                                                                                                                            | N                                | 21                            | 218                       | 6            | N                | Unc           | Unc                 |
| Austria     | Hafner[15]                       | 1998 | Obsv    | < 33 weeks                                                                                                                                   | Y                                | 91                            | 520                       | 0            | N                | Mod           | Under               |

|         |                                |      |      |                                          |     |    |      |    |   |         |           |
|---------|--------------------------------|------|------|------------------------------------------|-----|----|------|----|---|---------|-----------|
| Sweden  | Hakansson[16]                  | 2008 | Obsv | none                                     | N   | 28 | 327  | 0  | Y | Low     | Unc       |
| Israel  | Hashavya[17]                   | 2011 | Obsv |                                          | Y   | 92 | 3819 | 2  | N | Mod     | Unc       |
| USA     | Katz[18]                       | 1994 | Obsv |                                          | Y   | 92 | 237  | 0  | Y | Low/Mod | Unc/Under |
| Poland  | Kociszewska-Najman[19]         | 2010 | Obsv |                                          | Y   | 80 | 250  | 1  | N | Low     | Under     |
| Gambia  | Le Doare[20]                   | 2016 | Obsv | not planning to breastfeed, HIV positive | N   |    | 253  | 1  | N | Mod     | Under     |
| Taiwan  | Lin[21]                        | 2011 | Obsv |                                          | Y   | 90 | 447  | 2  | Y | Mod     | Under     |
| USA     | Lin[22]                        | 2011 | Obsv | <32 weeks                                | Y   | 69 | 904  | 1  | Y | Mod     | Under     |
| USA     | Morales[23]                    | 1986 | RCT  | <36 weeks, planned elective c-section    | RCT | 51 | 263  | 2  | Y | Mod     | Under     |
| USA     | Pass[24]                       | 1979 | Obsv |                                          | N   | 0  | 216  | 7  | Y | Unc     | Unc       |
| USA     | Pylipow[25]                    | 1994 | Obsv |                                          | N   | 21 | 331  | 11 | Y | Low/mod | Under     |
| Kenya   | Seale[26] (secondary analysis) | 2016 | Obsv | none                                     | N   | 0  | 608  | 3  | Y | Mod     | Under     |
| Poland  | Szymusik[27]                   | 2014 | Obsv | none                                     | Y   | 79 | 220  | 0  | Y | Mod     | Under     |
| France  | Thibaudon Baveux[28]           | 2008 | Obsv |                                          | Y   | 90 | 283  | 0  | Y | Mod     | Under     |
| Finland | Tuppurainen[29]                | 1989 | RCT  | c-section                                | RCT | 23 | 377  | 7  | N | Mod     | Over      |
| Italy   | Zuppa[30]                      | 2014 | Obsv | planned elective c-section               | Y   | 92 | 676  | 0  | Y | Mod     | Under     |

\*Design: Obsv=observational, RCT=Randomized controlled trial

\*\*Includes any intravenous antibiotics, either in the context of a policy of IAP for GBS colonization, or as treatment of a suspected infection, or in response to risk factors.

#Risk of bias: Unc=Unclear, Mod=moderate

##Direction of bias: Under=Underestimate, Over=overestimate, Unc=Unclear

Supplementary Table S4: Summary of risk of EOD in different IAP policy contexts and in the presence of risk factors (sensitivity analyses)

| <b>Meta-analysis</b>          | <b>Risk %</b>    | <b>Risk if any risk factor described</b> | <b>Risk only if gestation described</b> | <b>Risk if PROM described</b> | <b>Risk if maternal fever described</b> |
|-------------------------------|------------------|------------------------------------------|-----------------------------------------|-------------------------------|-----------------------------------------|
| All studies                   | 0.26%(0.13-0.40) | 0.32(0.14-0.50)                          | 0.29(0.08-0.51)                         | 0.32(0.0-0.65)                | 0.52(0.04-1.00)                         |
| No IAP policy                 | 1.05 (0.58-1.51) | 0.89 (0.41-1.37)                         | 0.88 (0.23-1.53)                        | 0.78 (0.48-1.49)              | 1.36 (0.43-2.29)                        |
| IAP policy (varying coverage) | 0.03 (0-0.07)    | 0.03(0-0.07)                             | 0.01(0-0.07)                            | 0.04(0-0.24)                  | 0.04(0-0.25)                            |

Supplementary Figure S1: Meta-analysis of risk of EOD with a policy of IAP for GBS colonized mothers

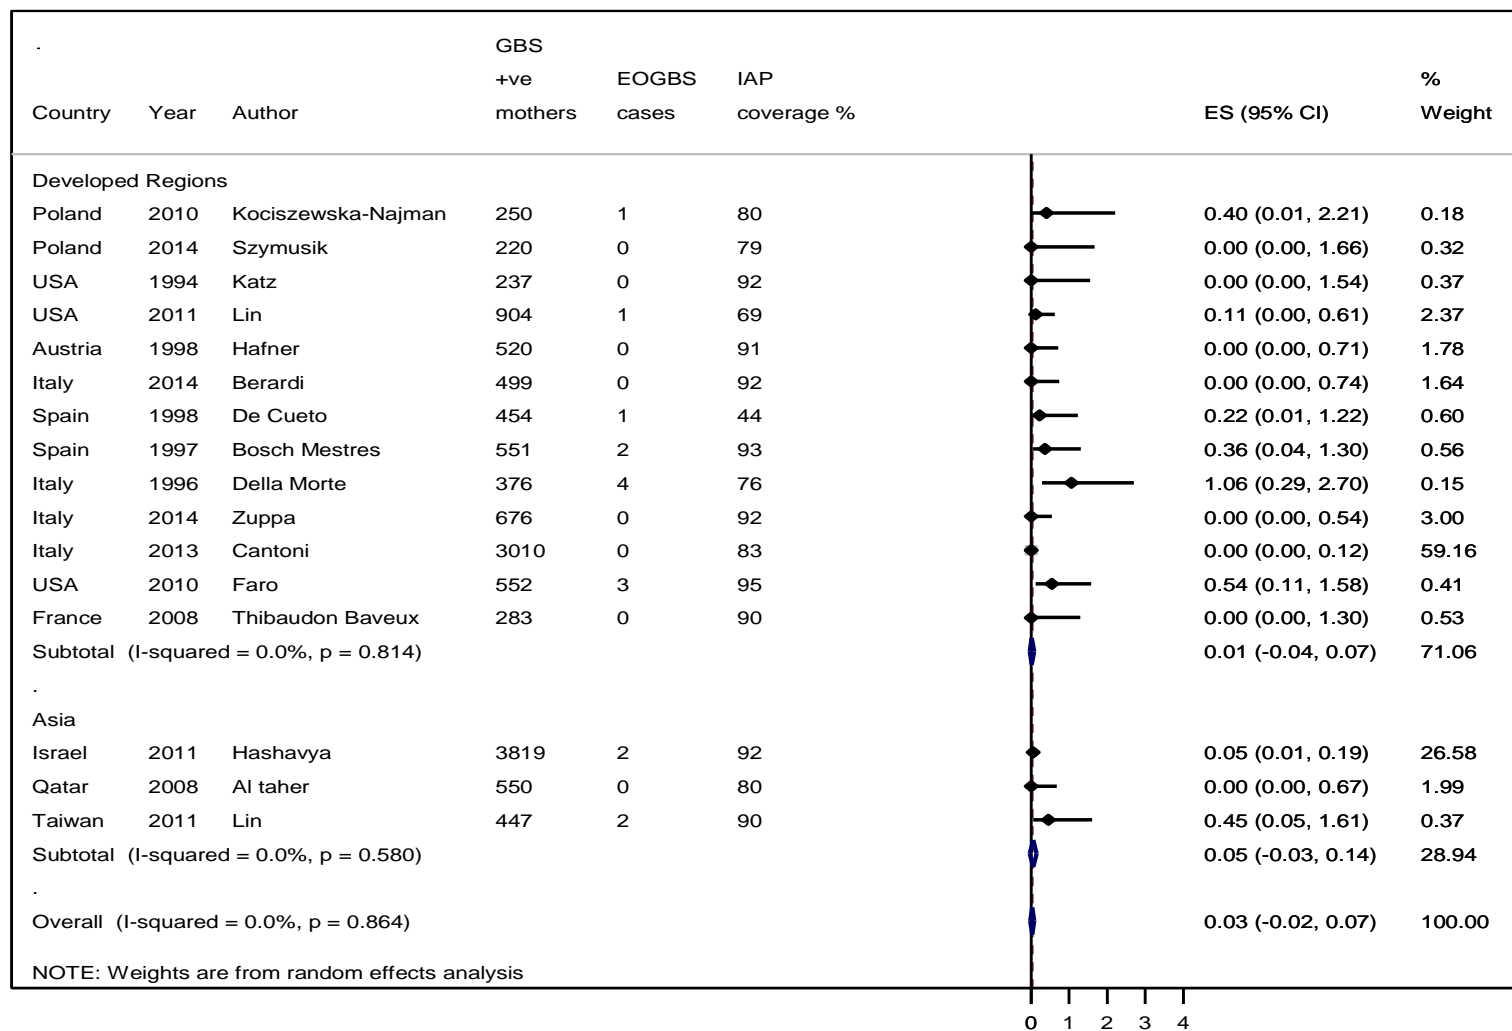



Supplementary Figure S2: Meta-analysis of risk of EOGBS (all studies regardless of IAP policy)

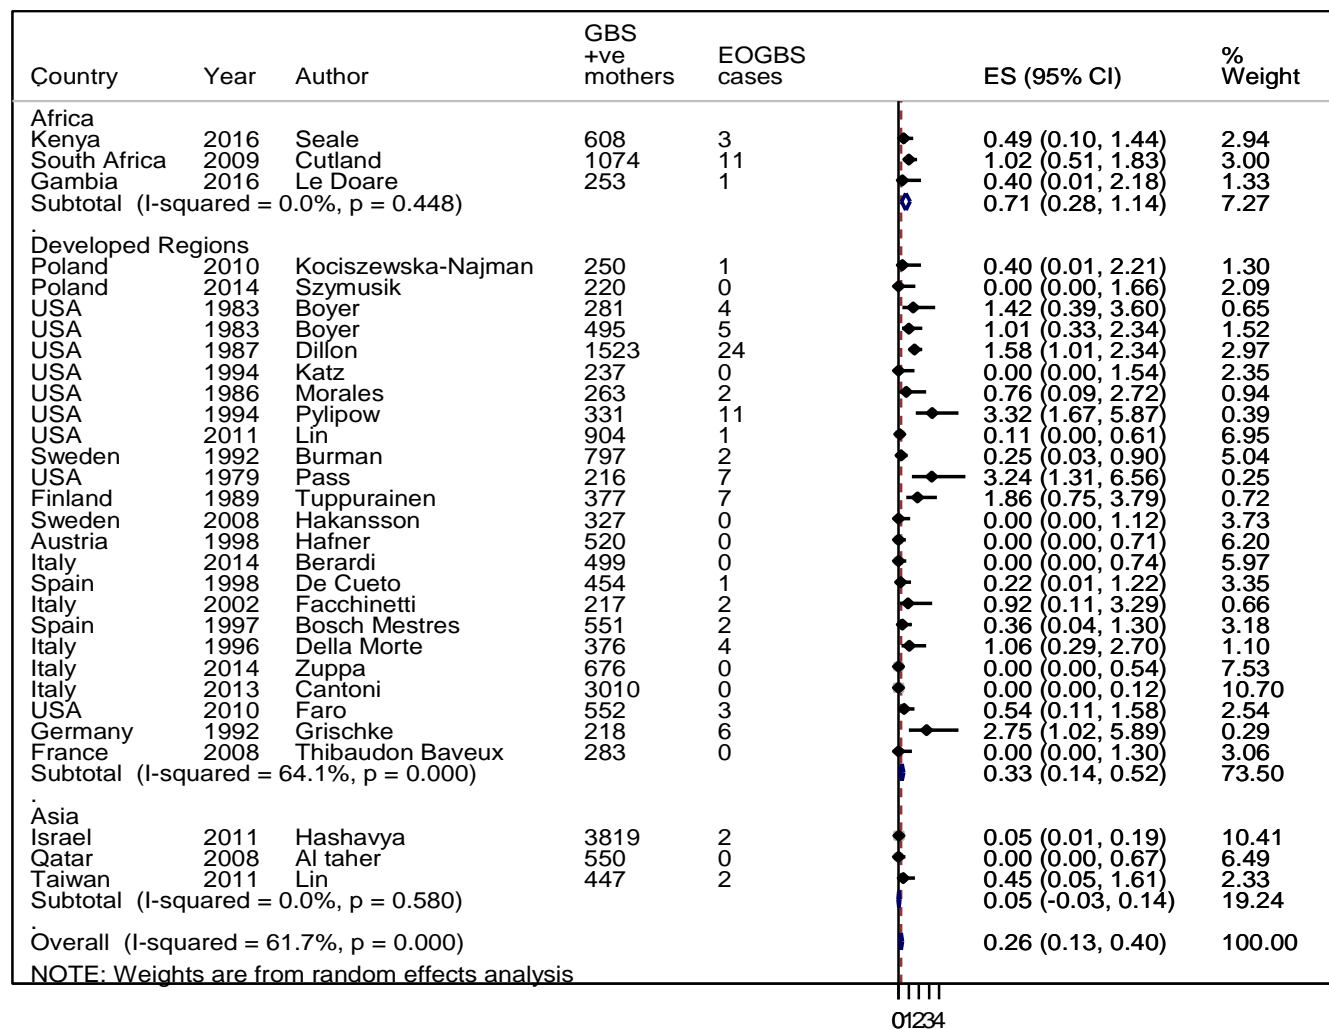

Supplementary Figure S3: Meta-analysis of studies describing any risk factor (regardless of IAP policy)

| Country                                 | Year | Author           | GBS<br>+ve<br>mothers | EOGBS<br>cases | ES (95% CI)       | %<br>Weight |
|-----------------------------------------|------|------------------|-----------------------|----------------|-------------------|-------------|
| Africa                                  |      |                  |                       |                |                   |             |
| Kenya                                   | 2016 | Seale            | 608                   | 3              | 0.49 (0.10, 1.44) | 4.19        |
| South Africa                            | 2009 | Cutland          | 1074                  | 11             | 1.02 (0.51, 1.83) | 4.27        |
| Subtotal (I-squared = 19.1%, p = 0.266) |      |                  |                       |                |                   | 8.45        |
| Developed Regions                       |      |                  |                       |                |                   |             |
| Poland                                  | 2014 | Szymusik         | 220                   | 0              | 0.00 (0.00, 1.66) | 3.16        |
| USA                                     | 1983 | Boyer            | 495                   | 5              | 1.01 (0.33, 2.34) | 2.39        |
| USA                                     | 1987 | Dillon           | 1523                  | 24             | 1.58 (1.01, 2.34) | 4.23        |
| USA                                     | 1994 | Katz             | 237                   | 0              | 0.00 (0.00, 1.54) | 3.49        |
| USA                                     | 1986 | Morales          | 263                   | 2              | 0.76 (0.09, 2.72) | 1.55        |
| USA                                     | 1994 | Pylipow          | 331                   | 11             | 3.32 (1.67, 5.87) | 0.67        |
| USA                                     | 2011 | Lin              | 904                   | 1              | 0.11 (0.00, 0.61) | 7.83        |
| Sweden                                  | 1992 | Burman           | 797                   | 2              | 0.25 (0.03, 0.90) | 6.31        |
| USA                                     | 1979 | Pass             | 216                   | 7              | 3.24 (1.31, 6.56) | 0.44        |
| Sweden                                  | 2008 | Hakansson        | 327                   | 0              | 0.00 (0.00, 1.12) | 5.06        |
| Italy                                   | 2014 | Berardi          | 499                   | 0              | 0.00 (0.00, 0.74) | 7.09        |
| Spain                                   | 1998 | De Cueto         | 454                   | 1              | 0.22 (0.01, 1.22) | 4.65        |
| Italy                                   | 2002 | Facchinetti      | 217                   | 2              | 0.92 (0.11, 3.29) | 1.12        |
| Spain                                   | 1997 | Bosch Mestres    | 551                   | 2              | 0.36 (0.04, 1.30) | 4.47        |
| Italy                                   | 1996 | Della Morte      | 376                   | 4              | 1.06 (0.29, 2.70) | 1.79        |
| Italy                                   | 2014 | Zuppa            | 676                   | 0              | 0.00 (0.00, 0.54) | 8.23        |
| Italy                                   | 2013 | Cantoni          | 3010                  | 0              | 0.00 (0.00, 0.12) | 10.07       |
| USA                                     | 2010 | Faro             | 552                   | 3              | 0.54 (0.11, 1.58) | 3.72        |
| France                                  | 2008 | Thibaudon Baveux | 283                   | 0              | 0.00 (0.00, 1.30) | 4.33        |
| Subtotal (I-squared = 64.4%, p = 0.000) |      |                  |                       |                |                   | 80.59       |
| Asia                                    |      |                  |                       |                |                   |             |
| Qatar                                   | 2008 | Al taher         | 550                   | 0              | 0.00 (0.00, 0.67) | 7.49        |
| Taiwan                                  | 2011 | Lin              | 447                   | 2              | 0.45 (0.05, 1.61) | 3.46        |
| Subtotal (I-squared = 7.1%, p = 0.299)  |      |                  |                       |                |                   | 10.96       |
| Overall (I-squared = 64.5%, p = 0.000)  |      |                  |                       |                |                   | 100.00      |

NOTE: Weights are from random effects analysis

01234

Supplementary Figure S4: Meta-analysis of studies describing gestational age (regardless of IAP policy)

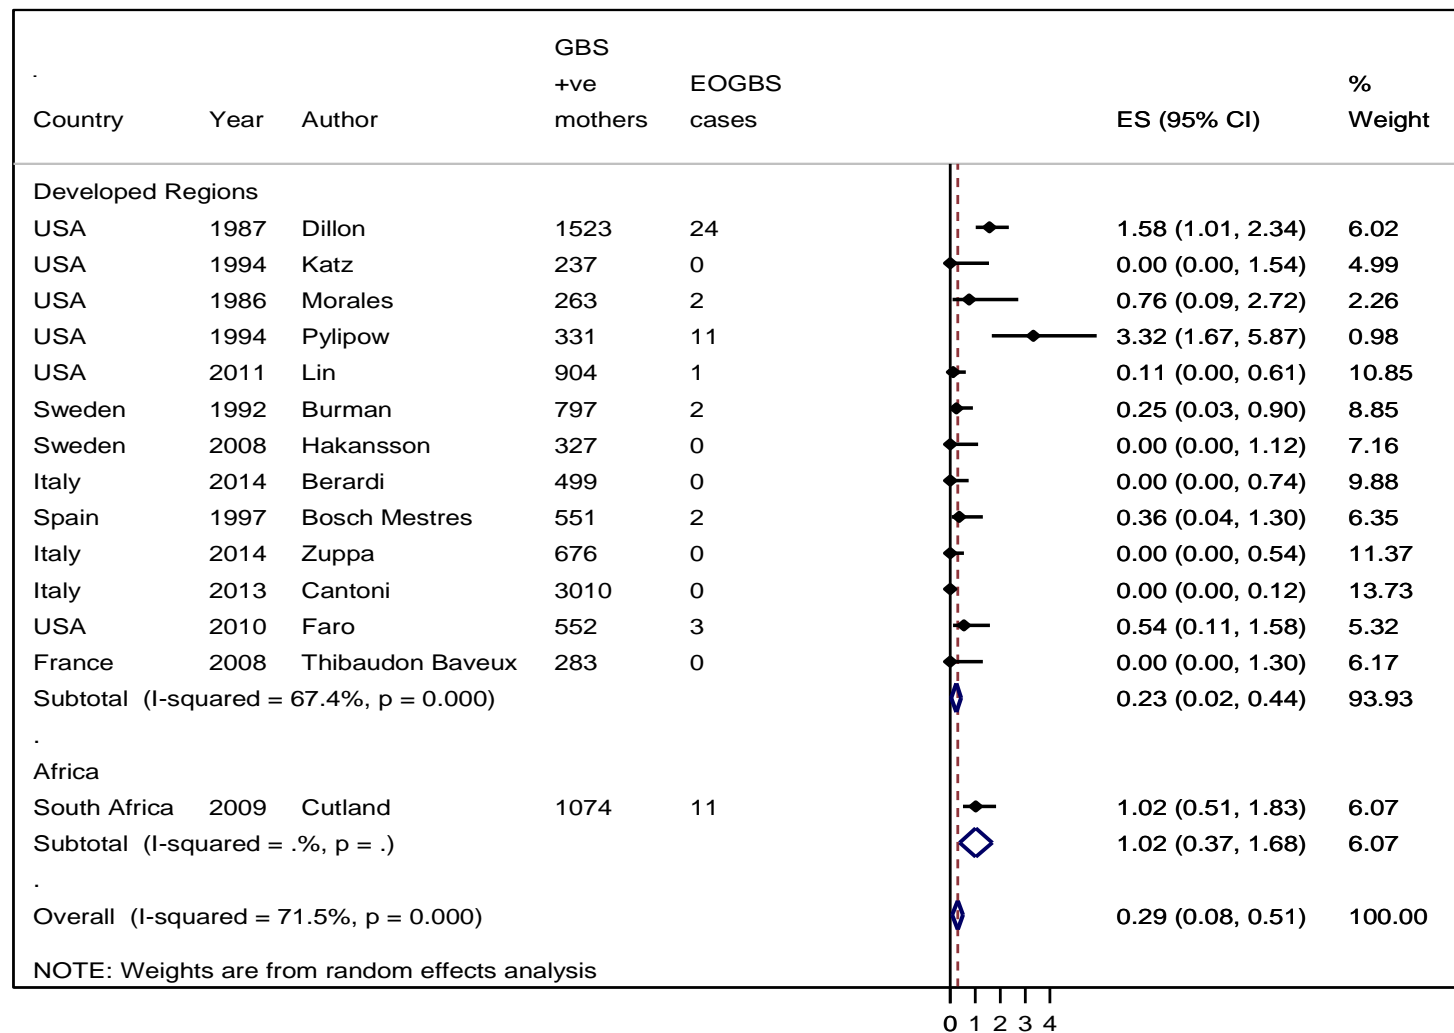

Supplementary Figure S5: Meta-analysis of studies describing prolonged rupture of membranes (regardless of IAP policy)

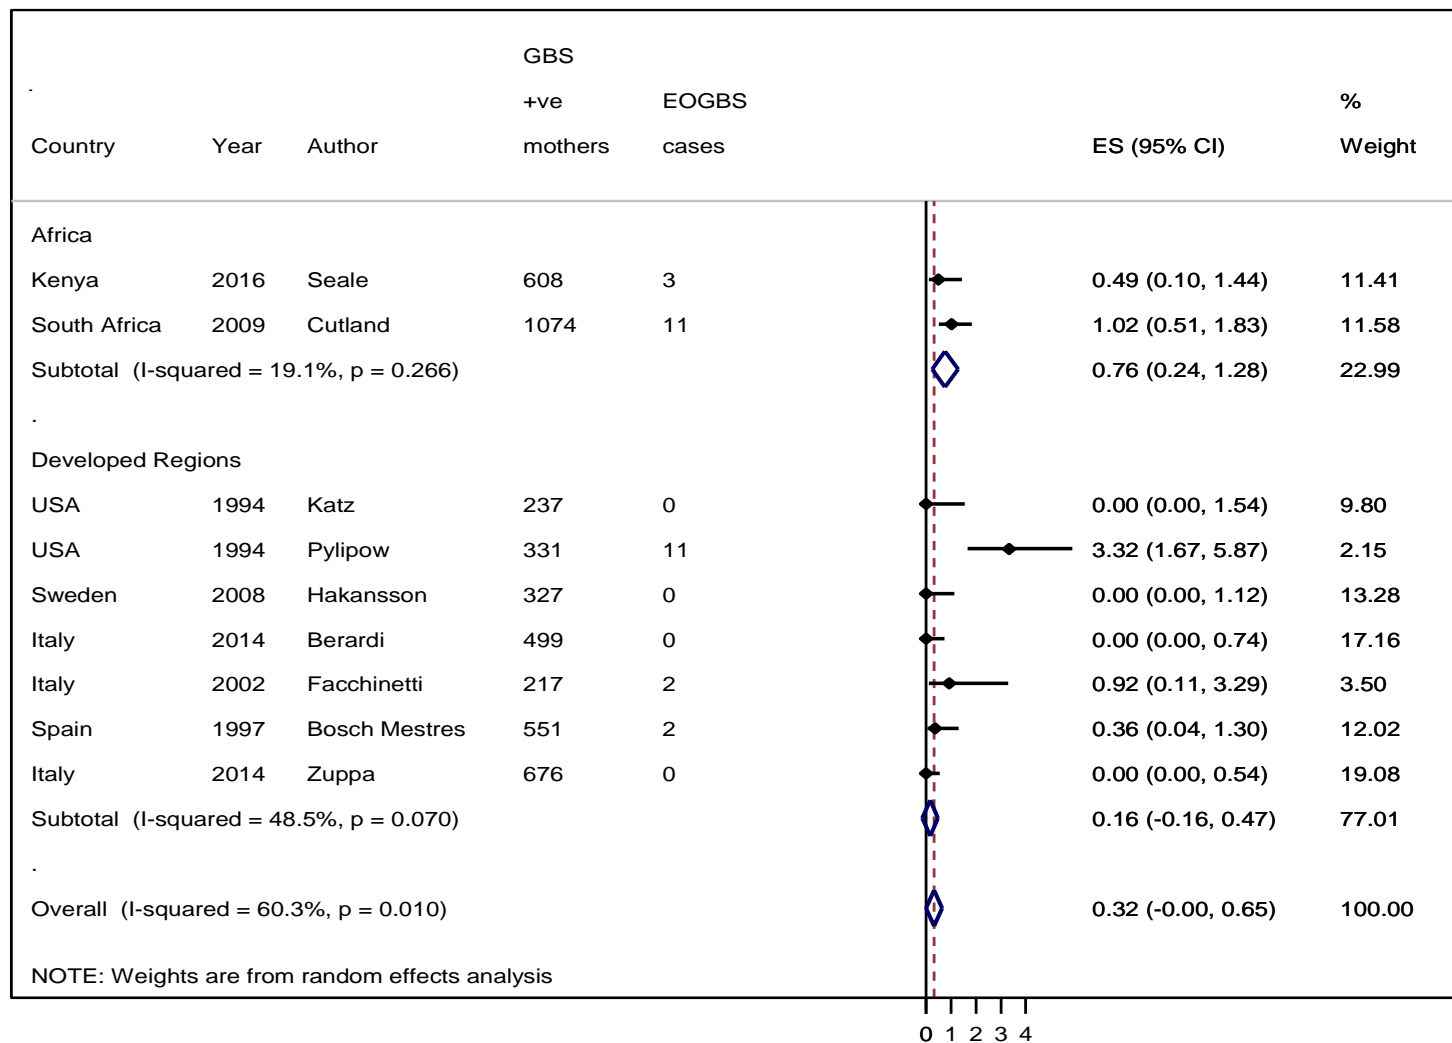

Supplementary Figure S6: Meta-analysis of studies describing maternal fever (regardless of IAP policy)

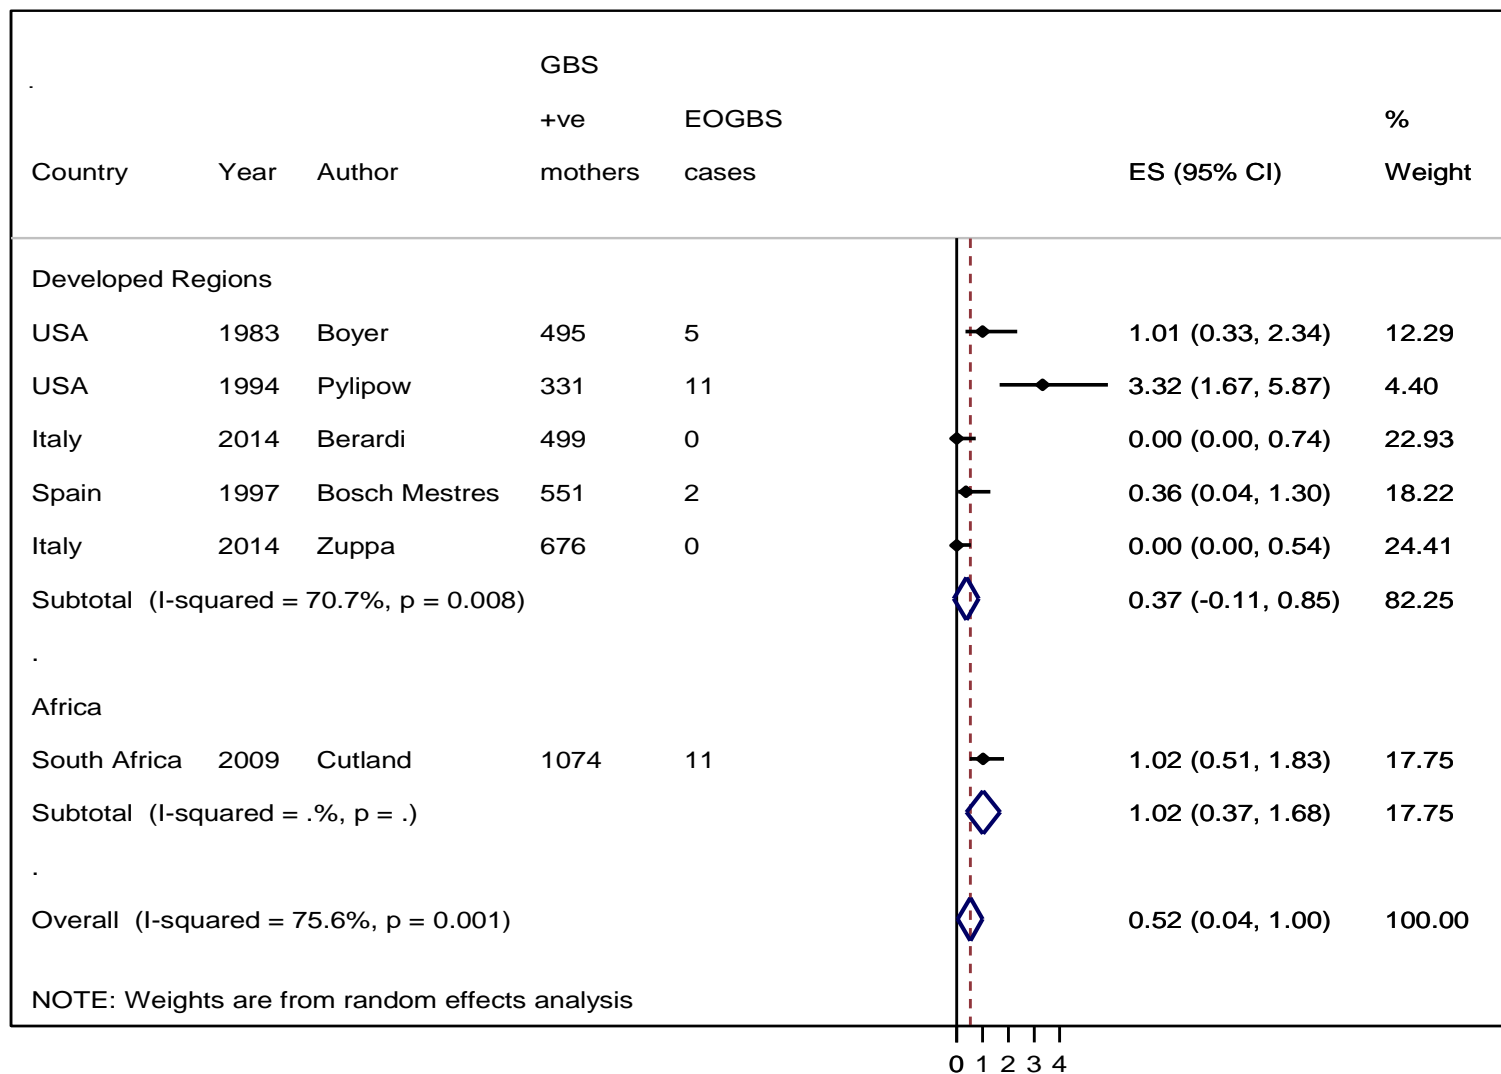

Supplement: cix655_suppl_supplement-material.pdf [file cix655_suppl_supplement-material.pdf]
